# Supplementary material for: Sources and transformations of anthropogenic nitrogen along an urban river–estuarine continuum
Source: Copernicus journal article supplement (doi:10.5194/bg-13-6211-2016), 2016-11-18
Supplement: Supplementary file 1 [file bg-13-6211-2016-supplement.pdf]

Supplement of Biogeosciences, 13, 6211–6228, 2016  
<http://www.biogeosciences.net/13/6211/2016/>  
doi:10.5194/bg-13-6211-2016-supplement  
© Author(s) 2016. CC Attribution 3.0 License.

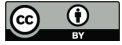

*Supplement of*

## **Sources and transformations of anthropogenic nitrogen along an urban river–estuarine continuum**

**Michael J. Pennino et al.**

*Correspondence to:* Michael J. Pennino ([michael.pennino@gmail.com](mailto:michael.pennino@gmail.com))

The copyright of individual parts of the supplement might differ from the CC-BY 3.0 licence.

23 **Contents of this file**

24

25 Introduction

26 Text S1. Methods

27 Text S1.1 Site Description

28 Text S1.2 Water Sampling and Analysis

29

30 Figure S1. Comparison of nitrate isotope box model results when using bottom  $\delta^{15}\text{N}$ -

31  $\text{NO}_3^-$  isotope value from (Horrigan et al. (1990), which reported the bottom water  $\delta^{15}\text{N}$ -

32  $\text{NO}_3^-$  value to be  $\sim 10\%$ .

33 Table S1. Potomac River Estuary sampling locations and coordinates.

34 Table S2. Comparison between box model (this study) and Chesapeake Bay Model

35 results.

36

37

38

39 **Introduction**

40 The supporting information contains additional details on the methods used for this

41 study and additional description of specific results and analysis of the data used in this

42 study. This supporting information also contains data to validate the box model analysis

43 used in the study and additional results that support the findings of the paper.

44

45 **Text S1. Methods**

46 Text S1.1 Site Description

47 The Potomac River drains water from both Maryland and Virginia and forms the  
48 border between these two states. The entire Potomac River basin has a total drainage of  
49 approximately 38,000 km<sup>2</sup> and is comprised of 16% cropland, 12% Pasture, 55% forest,  
50 5% water and wetlands, 10% urban, and 3% other (Boynton et al. 1995). The upper  
51 Potomac is freshwater and drains rural and agricultural areas above Washington D.C.,  
52 while the Potomac River Estuary begins as tidal freshwater and salinity starts to increase  
53 30 to 50 km downriver (Jaworski et al. 1992). The upper Potomac River Basin is  
54 classified as 48% forested, 38% agricultural, and 14% urban (Karrh et al. 2007).

55 Sources of both nitrogen to the Potomac River include wastewater treatment  
56 effluent (e.g. the Blue Plains Wastewater Treatment Plant), urban and agricultural runoff,  
57 and atmospheric deposition. For the entire Potomac, the sources above the fall-line are  
58 11.3% point, 84.6% diffuse, while the sources below the fall-line are 76.7% point, 15.4%  
59 diffuse, and 5.4% atmospheric (Boynton et al. 1995). The study by Jaworski et al. (1992)  
60 indicates that for the upper Potomac River, total nitrogen (TN) inputs are 27.5%  
61 atmospheric deposition, 42.65% animal waste, 11.6% fixation and adsorption, 16%  
62 fertilization, and 2.16% wastewater. The N outputs include 17.2% from river export,  
63 17.1% from crop harvest, and 65.6% from other sinks and storage. Boynton et al. (1995)  
64 also estimates that internal losses of TN for denitrification rates above the fall-line are  
65 5.5% point, 16.3% diffuse of total inputs and losses, while the sources below fall-line are  
66 19.9% point, 19.6% diffuse of inputs and losses.

67

68 Text S1.2 Water Sampling and Analysis

69

70 Three sets of routine sampling along the Lower Potomac were carried out (See  
71 Figure 1). First, surface water was collected by small boat during seven separate months  
72 between September 2009 through January 2011 above and below the Blue Plains  
73 Wastewater Treatment Plant outfall (within 12 km). On each small boat cruise, 3-5  
74 samples were collected longitudinally within 6 km above the wastewater outfall, one  
75 sample was collected in the estuary at the Blue Plains effluent outfall, and 4-6 samples  
76 were collected longitudinally within 12 km below the outfall. Monthly effluent samples  
77 were also taken from the wastewater treatment plant before emptying into the estuary.  
78 Second, monthly surface water samples were collected from nine Maryland Department  
79 of Natural Resources sampling stations, located longitudinally down the Potomac River  
80 Estuary, all the way to the Chesapeake Bay (from April 2010 to March 2011). Thirdly,  
81 there were two larger multi-depth sampling cruises from 24 sampling stations along the  
82 entire Lower Potomac River Estuary (August 2010 and May 2011). Samples were taken  
83 at surface, middle and bottom depths during these two larger intensive sampling cruises.  
84 See Table S1 for site coordinates for the sampling stations.

85 At each sampling location, a 1-liter plastic amber HPDE bottle (cleaned in 10%  
86 HCl and distilled water) was used to take estuarine water samples. The surface water  
87 samples were collected using a pump and hose on the boat at 0.5-meter depth. The 1-liter  
88 bottle was then stored in a cooler, on icepacks until returning to the lab, where water was  
89 stored in the refrigerator, until filtered within 24 hours.

90 Water was filtered through 47 mm/0.45  $\mu$ m glass fiber filter. The filtered water  
91 was then partitioned into two bottles: one 30 ml Nalgene bottle, one 60 mL glass amber

92 Quorpak bottle. The 30 mL Nalgene bottle was frozen and saved for nitrate isotope  
93 analysis. The 60 mL amber bottle was stored in a refrigerator (at 4°C), to be analyzed for  
94 fluorescence within 3-weeks. For quality assurance, blank samples and replicates were  
95 taken. The concentration of all total and dissolved forms of N, P, C were measured by  
96 Nutrient Analytical Services Laboratory (NASL) at Chesapeake Biological Laboratory  
97 (CBL).

98

99 Text S1.3 Salinity vs. Nitrate Concentration and Isotope Mixing Plots

100 The following equations from (Middelburg and Nieuwenhuize 2001) were used  
101 for calculating the mixing lines. End member values for these equations were based on  
102 the salinity, nitrate concentration, and nitrate isotope values found at the furthest up-  
103 estuary sampling station and furthest down-estuary sampling station (Table S2).

104

105 
$$S = f \times Sm + (1 - f) \times Sr \quad (1)$$

106

107 
$$f = \frac{S - Sr}{Sm - Sr} \quad (2)$$

108

109 
$$N = f \times Nm + (1 - f) \times Nr \quad (4)$$

110

111 
$$\delta^{15}N = \frac{(\delta^{15}Nm \times f \times Nm + \delta^{15}Nr \times (1-f) \times Nr)}{N} \quad (5)$$

112

113 Where,

114 S = salinity of sample

115  $S_r$  = salinity of freshwater endmember  
116  $S_m$  = Salinity of marine endmember  
117  $f$  = seawater fraction  
118  $N$  = Nitrate concentration of sample  
119  $^{15}N$  =  $^{15}N$  nitrate of the sample  
120  $^{15}N_r$  =  $^{15}N$  nitrate of freshwater endmember  
121  $^{15}N_m$  =  $^{15}N$  nitrate of marine endmember  
122  
123  
124  
125  
126  
127  
128  
129  
130  
131  
132  
133  
134  
135  
136

137  
138

**Table S1. Potomac River Estuary sampling locations and coordinates.**

| Shorter intensive synoptic surveys |               |               |               | Seasonal extensive synoptic surveys |               |               |               |
|------------------------------------|---------------|---------------|---------------|-------------------------------------|---------------|---------------|---------------|
| Site                               | Distance (km) | Latitude      | Longitude     | Site                                | Distance (km) | Latitude      | Longitude     |
| TF2.1                              | 12.1          | 38°42'23.91"N | 77°02'55.54"W | POTN28                              | -5.6          | 38°54'36.00"N | 77°05'60.00"W |
| TF2.2                              | 17.8          | 38°41'26.43"N | 77°06'40.00"W | POTN27                              | -5.9          | 38°52'48.00"N | 76°58'12.00"W |
| TF2.3                              | 29.6          | 38°36'29.52"N | 77°10'26.04"W | POTN26                              | -3.5          | 38°51'00.00"N | 77°01'12.00"W |
| TF2.4                              | 41.4          | 38°31'48.36"N | 77°15'55.44"W | POTN25                              | 1.2           | 38°49'48.00"N | 77°01'48.00"W |
| RET2.1                             | 55.6          | 38°24'12.60"N | 77°16'08.76"W | POTN24                              | 0.7           | 38°48'37.62"N | 77°02'02.16"W |
| RET2.2                             | 64.0          | 38°21'09.00"N | 77°12'18.36"W | POTN23                              | 11.8          | 38°42'30.96"N | 77°02'40.32"W |
| RET2.4                             | 87.9          | 38°21'45.36"N | 76°59'26.27"W | POTN22                              | 20.6          | 38°40'03.90"N | 77°07'52.68"W |
| LE2.2                              | 130.1         | 38°09'27.36"N | 76°35'52.80"W | POTN21                              | 20.6          | 38°40'16.86"N | 77°08'01.86"W |
| LE2.3                              | 156.6         | 38°01'17.40"N | 76°20'51.72"W | POTN20                              | 37.3          | 38°34'16.50"N | 77°14'29.76"W |
| Monthly extensive synoptic surveys |               |               |               | POTN19                              | 48.7          | 38°28'32.04"N | 77°16'50.94"W |
| PR1                                | -6.6          | 38°52'22.65"N | 77°02'12.28"W | POTN18                              | 52.3          | 38°26'48.60"N | 77°18'09.66"W |
| PR2                                | -5.4          | 38°51'44.88"N | 77°01'57.52"W | POTN17                              | 59.0          | 38°23'33.78"N | 77°16'09.54"W |
| PR3                                | -6.1          | 38°51'52.86"N | 77°00'32.14"W | POTN16                              | 63.5          | 38°21'35.88"N | 77°14'16.26"W |
| PR4                                | -4.2          | 38°51'04.71"N | 77°01'19.83"W | POTN15                              | 76.8          | 38°24'22.26"N | 77°06'46.44"W |
| PR5                                | -2.7          | 38°50'18.55"N | 77°01'35.62"W | POTN14                              | 74.6          | 38°23'23.28"N | 77°07'11.52"W |
| PR6                                | -1.8          | 38°49'48.63"N | 77°01'45.26"W | POTN13                              | 85.0          | 38°26'49.02"N | 77°01'50.58"W |
| PR7                                | -0.8          | 38°49'15.85"N | 77°01'50.84"W | POTN12                              | 82.0          | 38°24'33.72"N | 77°02'26.64"W |
| PR8                                | -0.4          | 38°48'49.46"N | 77°01'54.32"W | POTN11                              | 93.8          | 38°19'38.34"N | 76°58'41.52"W |
| PR9                                | 0             | 38°48'51.32"N | 77°01'39.79"W | POTN10                              | 95.8          | 38°17'56.16"N | 77°00'21.60"W |
| PR10                               | 0.26          | 38°48'43.10"N | 77°01'39.62"W | POTN09                              | 110.1         | 38°20'52.02"N | 76°51'12.48"W |
| PR11                               | 0.58          | 38°48'33.04"N | 77°01'39.61"W | POTN08                              | 111.8         | 38°18'35.64"N | 76°50'24.96"W |
| PR12                               | 1.1           | 38°48'19.45"N | 77°01'55.69"W | POTN07                              | 112.8         | 38°14'25.02"N | 76°49'04.32"W |
| PR13                               | 2.0           | 38°47'17.81"N | 77°02'10.81"W | POTN06                              | 115.8         | 38°11'24.90"N | 76°49'16.86"W |
| PR14                               | 3.5           | 38°46'57.39"N | 77°01'50.51"W | POTN05                              | 136.8         | 38°11'45.78"N | 76°34'46.32"W |
| PR15                               | 5.2           | 38°46'04.78"N | 77°02'04.56"W | POTN04                              | 135.8         | 38°09'38.10"N | 76°36'01.86"W |
| PR16                               | 8.0           | 38°44'33.36"N | 77°02'10.33"W | POTN03                              | 153.5         | 38°05'00.36"N | 76°25'16.56"W |
| PR17                               | 11.6          | 38°42'38.33"N | 77°02'27.29"W | POTN02                              | 156.7         | 38°02'24.60"N | 76°25'11.94"W |
|                                    |               |               |               | POTN01                              | 158.4         | 38°00'41.58"N | 76°25'45.00"W |

\*Distances are along the Potomac River, relative to the location of the Blue Plains wastewater treatment plant, at location 0 km.

139  
140

141 **Table S2. Endmember values\* for salinity vs. nitrate concentration and isotope mixing lines**

|        | Winter | Spring | Summer | Fall |
|--------|--------|--------|--------|------|
| Sr =   | 0.11   | 0      | 0      | 0    |
| Sm =   | 15.8   | 11.0   | 14.2   | 16.7 |
| Nr     | 1.44   | 1.09   | 0.3    | 0.83 |
| Nm     | 0.0507 | 0.35   | 0.008  | 0.01 |
| 15Nr = | 9.85   | 11.0   | 15.1   | 16.8 |
| 15Nm = | 11.5   | 7.19   | 10.3   | 8.2  |
| 18Or   | 7.15   | 7.51   | 7.5    | 7.5  |
| 18Om   | 14.17  | 8.23   | -5.4   | -6.1 |

142 \*Values are based on the concentration or isotope values obtained from samples at the most up-estuary (TF2.1) or down-estuary (LE2.3) sampling  
 143 stations.  
 144  
 145  
 146  
 147  
 148  
 149  
 150  
 151  
 152  
 153  
 154  
 155  
 156  
 157  
 158  
 159  
 160  
 161  
 162  
 163  
 164  
 165  
 166  
 167  
 168



169

170

**Table S3. Comparison between box model (this study) and Chesapeake Bay Model results.**

| Season | Distance<br>(km) | Box Model        |                          | Factor<br>Difference | %<br>Difference | Correlation<br>Coefficient |
|--------|------------------|------------------|--------------------------|----------------------|-----------------|----------------------------|
|        |                  | Flux<br>(kg/day) | Bay Model<br>Flux (kg/d) |                      |                 |                            |
| Winter | 30               | 49,752           | 66,708                   | 1                    | 25              | 0.97                       |
| Winter | 49               | 34,410           | 56,333                   | 2                    | 39              |                            |
| Winter | 95               | 19,844           | 26,926                   | 1                    | 26              |                            |
| Spring | 30               | 116,848          | 97,924                   | 1                    | 19              | 0.99                       |
| Spring | 49               | 120,809          | 94,732                   | 1                    | 28              |                            |
| Spring | 95               | 68,431           | 55,274                   | 1                    | 24              |                            |
| Summer | 30               | 9,411            | 21,919                   | 2                    | 57              | 0.73                       |
| Summer | 49               | 5,971            | 8,851                    | 1                    | 33              |                            |
| Summer | 95               | 4,853            | 15,496                   | 3                    | 69              |                            |
| Fall   | 30               | 11,347           | 19,855                   | 2                    | 43              | 0.85                       |
| Fall   | 49               | 5,867            | 9,707                    | 2                    | 40              |                            |
| Fall   | 95               | (1,613)          | 9,790                    | (6)                  | 116             |                            |

171

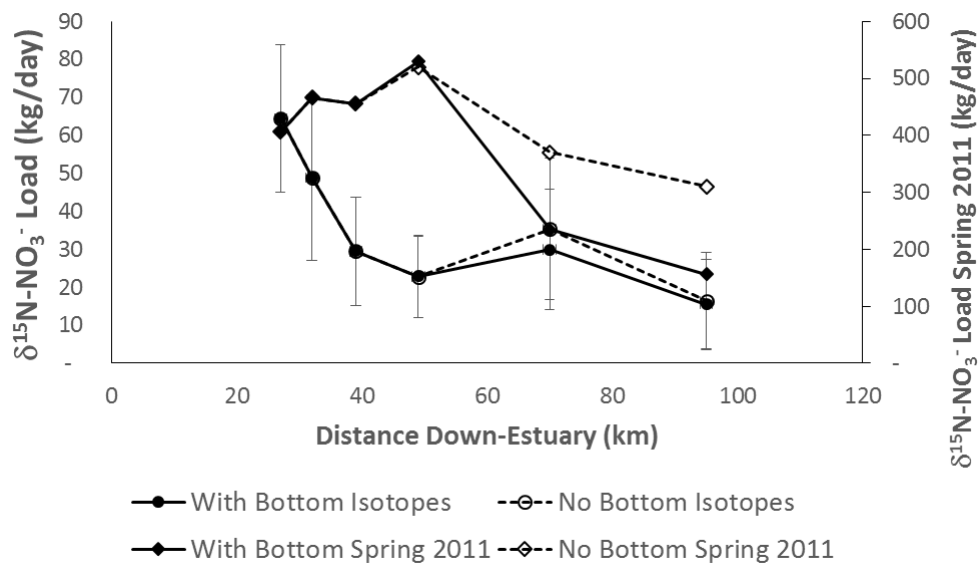

172

173 Figure S1. Comparison of nitrate isotope box model results when using bottom  $\delta^{15}\text{N-NO}_3^-$   
 174  $\text{NO}_3^-$  isotope value from (Horrigan et al. (1990), which reported the bottom water  $\delta^{15}\text{N-NO}_3^-$   
 175  $\text{NO}_3^-$  value to be  $\sim 10\text{‰}$ .  
 176

177

178

179

180

181

182

183

184

185

186

187

188

189 **References**

- 190 Boynton, W. R., J. H. Garber, R. Summers, and W. M. Kemp. 1995. Inputs,  
191 transformations, and transport of nitrogen and phosphorus in Chesapeake Bay and  
192 selected tributaries. *Estuaries* **18**:285-314.
- 193 Jaworski, N. A., P. M. Groffman, A. A. Keller, and J. C. Prager. 1992. A watershed  
194 nitrogen and phosphorus balance - the upper Potomac River basin. *Estuaries*  
195 **15**:83-95.
- 196 Karrh, R., W. Romano, S. Garrison, B. Michael, M. Hall, K. Coyne, D. Reynolds, and B.  
197 Ebersole. 2007. Maryland Tributary Strategy Upper Potomac River Basin  
198 Summary Report for 1985-2005 Data. Maryland Department of Natural  
199 Resources.
- 200 Middelburg, J. J., and J. Nieuwenhuize. 2001. Nitrogen isotope tracing of dissolved  
201 inorganic nitrogen behaviour in tidal estuaries. *Estuarine Coastal and Shelf*  
202 *Science* **53**:385-391.
- 203
